# Supplementary material for: Prevalence and predictors of influenza vaccination in long-term care homes: a cross-national retrospective observational study
Source: PubMed Central journal article supplement — BMJ Open. 2022 Apr 18;12(4):e057517. doi: 10.1136/bmjopen-2021-057517 (PMC9016404; doi:10.1136/bmjopen-2021-057517), 2022-04-18
Supplement: bmjopen-2021-057517.reviewer_comments.pdf [file bmjopen-2021-057517.reviewer_comments.pdf]

## PEER REVIEW HISTORY

BMJ Open publishes all reviews undertaken for accepted manuscripts. Reviewers are asked to complete a checklist review form (<http://bmjopen.bmj.com/site/about/resources/checklist.pdf>) and are provided with free text boxes to elaborate on their assessment. These free text comments are reproduced below.

### ARTICLE DETAILS

|                            |                                                                                                                                                                               |
|----------------------------|-------------------------------------------------------------------------------------------------------------------------------------------------------------------------------|
| <b>TITLE (PROVISIONAL)</b> | Prevalence and Predictors of Influenza Vaccination in Long-term Care Homes: A Cross-national Retrospective Observational Study                                                |
| <b>AUTHORS</b>             | Mulla, Reem T.; Turcotte, Luke; Wellens, Nathalie; Angevaere, Milou; Weir, Julie; Jantzi, Micaela; Hébert, Paul; Heckman, George; van Hout, Hein; Millar, Nigel; Hirdes, John |

### VERSION 1 – REVIEW

|                        |                                     |
|------------------------|-------------------------------------|
| <b>REVIEWER</b>        | Santangelo, Omar E.<br>Univ Palermo |
| <b>REVIEW RETURNED</b> | 17-Dec-2021                         |

|                         |                                                                                                                                                                                                                                                                                                                                                                                                                                                                                                                                         |
|-------------------------|-----------------------------------------------------------------------------------------------------------------------------------------------------------------------------------------------------------------------------------------------------------------------------------------------------------------------------------------------------------------------------------------------------------------------------------------------------------------------------------------------------------------------------------------|
| <b>GENERAL COMMENTS</b> | <p>The study has adequate scientific rigor, it needs minor revisions. Here are some indications:</p> <p>Please explain better what interRAI Long-Term Care Facilities (LTCF) is, not all readers may know it.</p> <p>Please make the results and tables easier to read. If possible add simpler labels to show the variables.</p> <p>Please implement the conclusions by explaining how these findings can be useful for the government for public health interventions and prevention campaigns.</p> <p>Please check your English.</p> |
|-------------------------|-----------------------------------------------------------------------------------------------------------------------------------------------------------------------------------------------------------------------------------------------------------------------------------------------------------------------------------------------------------------------------------------------------------------------------------------------------------------------------------------------------------------------------------------|

|                        |                                                                         |
|------------------------|-------------------------------------------------------------------------|
| <b>REVIEWER</b>        | Barqawi, Hiba<br>University of Sharjah, Department of Clinical Sciences |
| <b>REVIEW RETURNED</b> | 20-Dec-2021                                                             |

|                         |                                |
|-------------------------|--------------------------------|
| <b>GENERAL COMMENTS</b> | Interesting article. Good read |
|-------------------------|--------------------------------|
