# Supplementary material for: Prevalence and predictors of influenza vaccination in long-term care homes: a cross-national retrospective observational study
Source: PubMed Central journal article supplement — BMJ Open. 2022 Apr 18;12(4):e057517. doi: 10.1136/bmjopen-2021-057517 (PMC9016404; doi:10.1136/bmjopen-2021-057517), 2022-04-18
Supplement: bmjopen-2021-057517supp001.pdf [file bmjopen-2021-057517supp001.pdf]

## Supplementary Data

*e-Table 1: Final Model, Odds ratio for receiving influenza vaccine by Canadian LTC home residents in New Brunswick*

| Odds Ratio Estimates     |                   |                |                            |      |
|--------------------------|-------------------|----------------|----------------------------|------|
| Effect                   |                   | Point Estimate | 95% Wald Confidence Limits |      |
| <b>CPS<sup>1</sup></b>   | <b>1-2 vs 0</b>   | 1.18           | 0.91                       | 1.52 |
| <b>CPS</b>               | <b>3-4 vs 0</b>   | 1.47           | 1.12                       | 1.92 |
| <b>CPS</b>               | <b>5-6 vs 0</b>   | 1.92           | 1.47                       | 2.50 |
| <b>CHESS<sup>2</sup></b> | <b>1-2 vs 0</b>   | 1.30           | 1.12                       | 1.50 |
| <b>CHESS</b>             | <b>3+ vs 0</b>    | 1.32           | 1.06                       | 1.64 |
| <b>RISE<sup>3</sup></b>  | <b>2-4 vs 0-1</b> | 1.06           | 0.86                       | 1.30 |
| <b>RISE</b>              | <b>5-6 vs 0-1</b> | 1.39           | 1.11                       | 1.72 |

\*C-statistic is 0.569.

<sup>1</sup> Cognitive Performance Scale (CPS) with 6 categories (0 = intact and 6= very severe impairment)

<sup>2</sup> Changes in Health and Symptoms and Signs Scale (CHESS) ranges from 0 = no instability in health to 5 = highly unstable health

<sup>3</sup> Revised Index of Social Engagement (RISE) ranges from 0 = lower levels of social engagement to 6 = higher level of social engagement

*e-Table II: Final Model, Odds ratio for receiving influenza vaccine by Swiss LTC home residents*

| <b>Odds Ratio Estimates</b> |                        |                       |                                   |      |
|-----------------------------|------------------------|-----------------------|-----------------------------------|------|
| <b>Effect</b>               |                        | <b>Point Estimate</b> | <b>95% Wald Confidence Limits</b> |      |
| <b>Age group</b>            | <b>65-74 vs &lt;65</b> | 1.23                  | 0.84                              | 1.82 |
| <b>Age group</b>            | <b>75-84 vs &lt;65</b> | 1.89                  | 1.33                              | 2.63 |
| <b>Age group</b>            | <b>85+ vs &lt;65</b>   | 2.17                  | 1.56                              | 3.03 |
| <b>MCC<sup>1</sup></b>      | <b>1 vs 0</b>          | 1.23                  | 1.03                              | 1.47 |
| <b>MCC</b>                  | <b>2 vs 0</b>          | 3.45                  | 1.56                              | 7.69 |
| <b>CPS<sup>2</sup></b>      | <b>1-2 vs 0</b>        | 1.25                  | 0.99                              | 1.56 |
| <b>CPS</b>                  | <b>3-4 vs 0</b>        | 1.11                  | 0.87                              | 1.41 |
| <b>CPS</b>                  | <b>5-6 vs 0</b>        | 2.13                  | 1.59                              | 2.86 |
| <b>CHESS<sup>3</sup></b>    | <b>1-2 vs 0</b>        | 1.25                  | 1.05                              | 1.49 |
| <b>CHESS</b>                | <b>3+ vs 0</b>         | 1.25                  | 0.90                              | 1.72 |
| <b>RISE<sup>4</sup></b>     | <b>2-4 vs 0-1</b>      | 1.56                  | 1.30                              | 1.89 |
| <b>RISE</b>                 | <b>5-6 vs 0-1</b>      | 2.56                  | 2.08                              | 3.13 |
| <b>ABS<sup>5</sup></b>      | <b>1-4 vs 0</b>        | 1.49                  | 1.22                              | 1.82 |
| <b>ABS</b>                  | <b>5+ vs 0</b>         | 1.16                  | 0.86                              | 1.56 |

\*C-statistics is 0.643.

<sup>1</sup> Major Comorbidity Count Algorithm (MCC) ranges from a minimum score of 0 = low risk to a maximum score of 6 = high risk

<sup>2</sup> Cognitive Performance Scale (CPS) with 6 categories (0 = intact and 6= very severe impairment)

<sup>3</sup> Changes in Health and Symptoms and Signs Scale (CHESS) ranges from 0 = no instability in health to 5 = highly unstable health

<sup>4</sup> Aggressive Behavior Scale (ABS) ranges from 0-12 with scores of 5 or more as a cut-off for severe aggressive behaviour disturbance

<sup>5</sup> Revised Index of Social Engagement (RISE) ranges from 0 = lower levels of social engagement to 6 = higher level of social engagement

*e-Table III: Final Model, Odds ratio for receiving influenza vaccine by Dutch LTC home residents*

| <b>Odds Ratio Estimates</b> |                        |                       |                                   |      |
|-----------------------------|------------------------|-----------------------|-----------------------------------|------|
| <b>Effect</b>               |                        | <b>Point Estimate</b> | <b>95% Wald Confidence Limits</b> |      |
| <b>Age group</b>            | <b>65-74 vs &lt;65</b> | 2.08                  | 1.15                              | 3.85 |
| <b>Age group</b>            | <b>75-84 vs &lt;65</b> | 1.72                  | 1.00                              | 2.94 |
| <b>Age group</b>            | <b>85+ vs &lt;65</b>   | 2.13                  | 1.25                              | 3.57 |
| <b>Smoke</b>                | <b>1 vs 0</b>          | 0.69                  | 0.50                              | 0.98 |
| <b>ABS<sup>1</sup></b>      | <b>1-4 vs 0</b>        | 0.77                  | 0.61                              | 0.97 |
| <b>ABS</b>                  | <b>5+ vs 0</b>         | 0.65                  | 0.46                              | 0.90 |
| <b>RISE<sup>2</sup></b>     | <b>2-4 vs 0-1</b>      | 1.30                  | 0.95                              | 1.75 |
| <b>RISE</b>                 | <b>5-6 vs 0-1</b>      | 1.45                  | 1.06                              | 1.96 |

\*C-statistics is 0.588.

<sup>1</sup>Aggressive Behavior Scale (ABS) ranges from 0-12 with scores of 5 or more as a cut-off for severe aggressive behaviour disturbance

<sup>2</sup>Revised Index of Social Engagement (RISE) ranges from 0 = lower levels of social engagement to 6 = higher level of social engagement
